# Supplementary material for: White Matter and Alzheimer’s Disease: A Bidirectional Mendelian Randomization Study
Source: Springer Nature journal article supplement (doi:10.1007/s40120-022-00353-9), 2022-05-03
Supplement: MOESM1 [file 20366212]

**Title:** White Matter and Alzheimer's Disease: A bidirectional Mendelian Randomization Study

**Authors:** Yaqing Li<sup>1</sup>, Jiaxin Zheng<sup>1</sup>, Tian Li<sup>1</sup>, Junjian Zhang<sup>1\*</sup>

<sup>1</sup> Department of Neurology, Zhongnan Hospital, Wuhan University, No.169, Donghu Road, Wuhan 430071, Hubei, China

\* **Corresponding author:** Department of Neurology, Zhongnan Hospital, Wuhan University, No.169, Donghu Road, Wuhan 430071, Hubei, China

Email address: wdsjkx@163.com (Junjian Zhang)

Tel.: +86 027 67812885

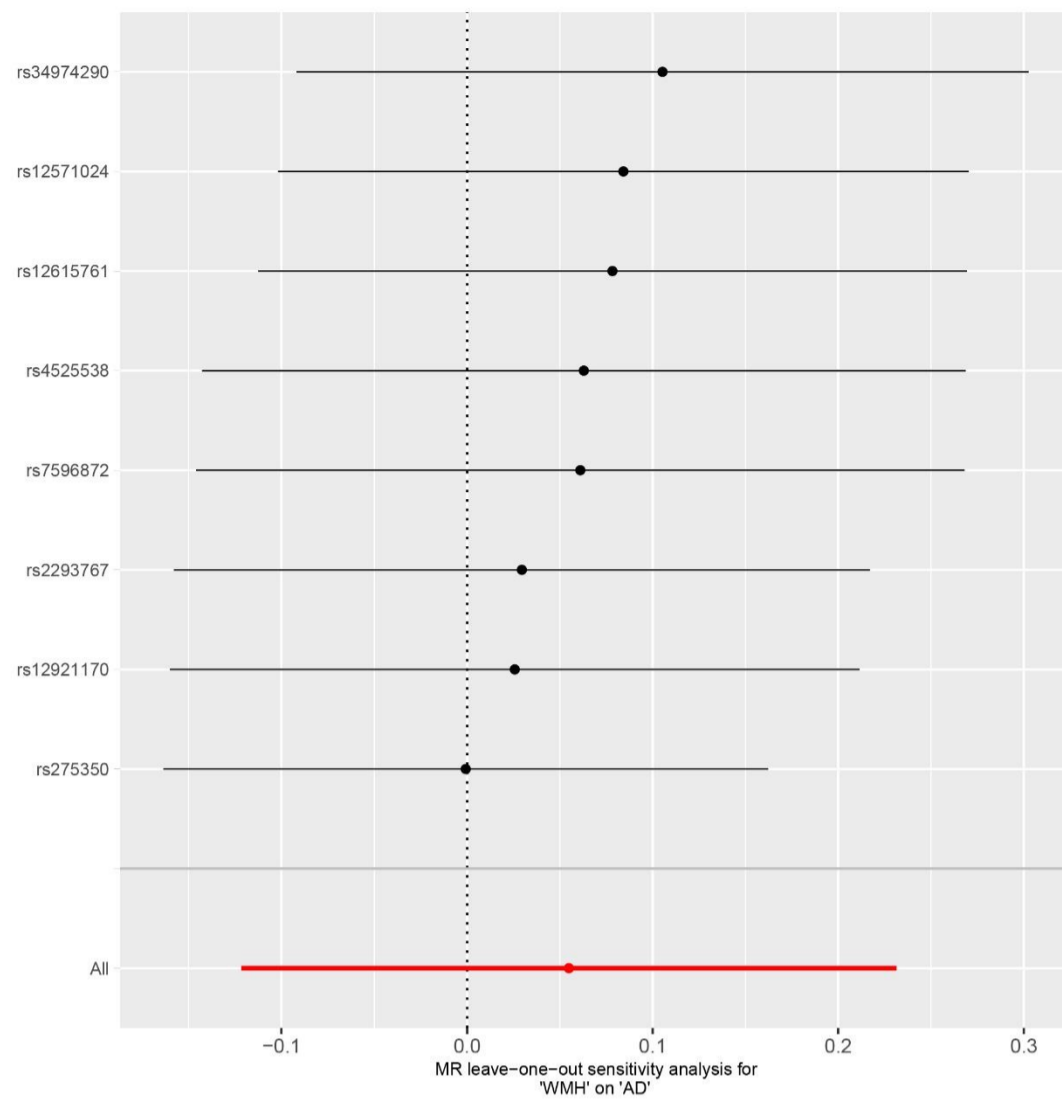

**FigureS1 MR leave-one-out sensitivity analysis for WMH on AD**

Abbreviations: WMH, white matter hyperintensities; AD, Alzheimer's disease

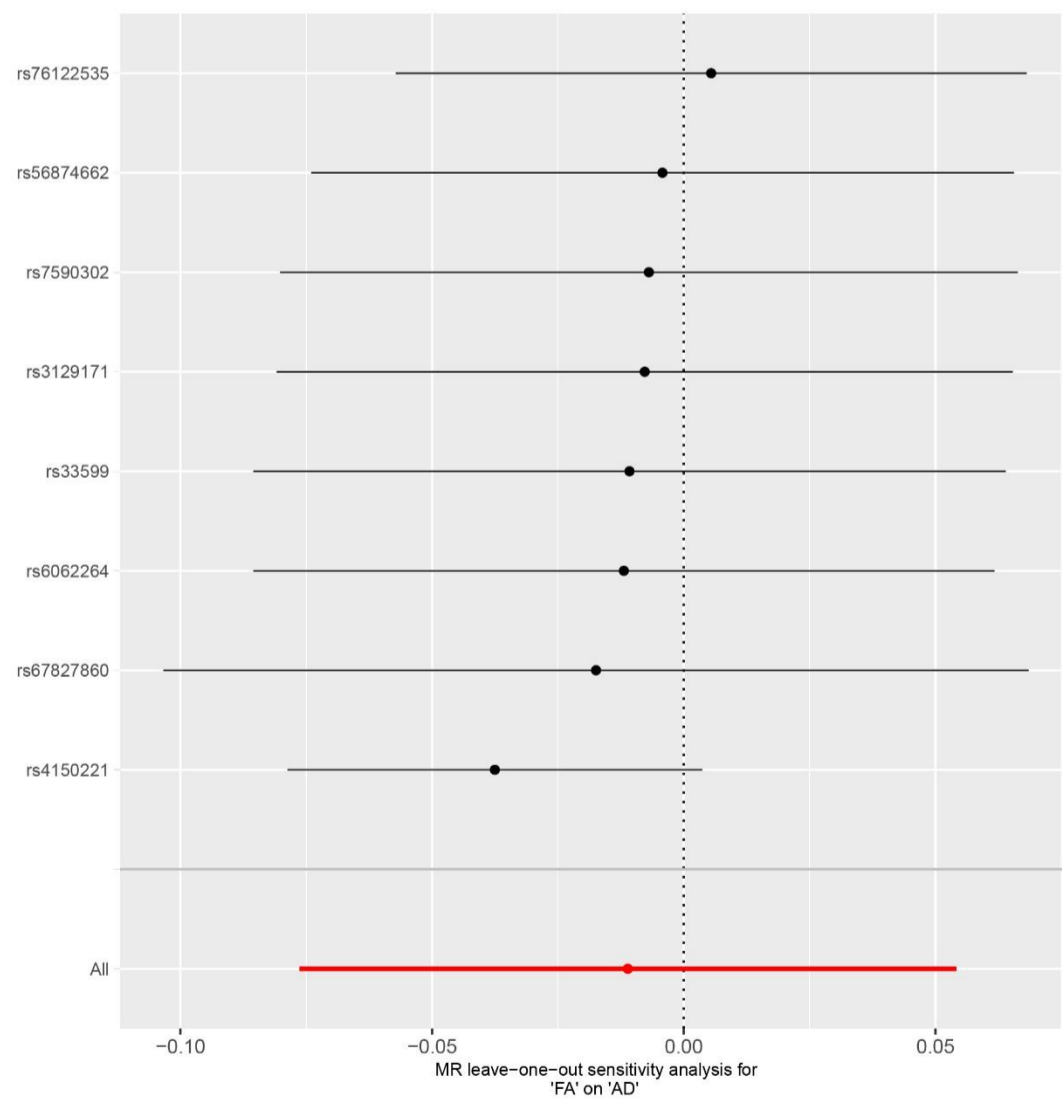

**FigureS2 MR leave-one-out sensitivity analysis for FA on AD**

Abbreviations: FA, fractional anisotropy; AD, Alzheimer's disease

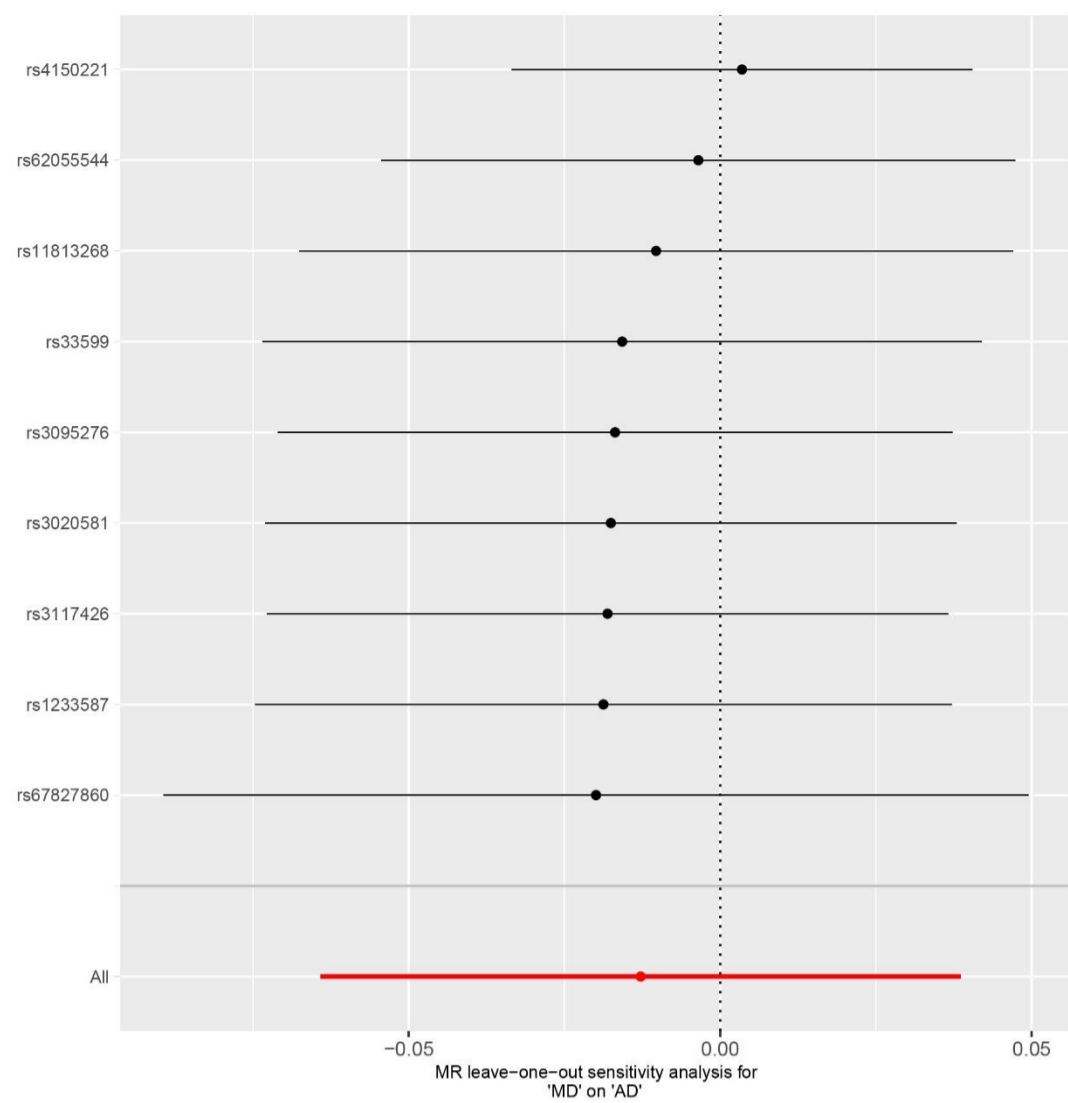

**FigureS3 MR leave-one-out sensitivity analysis for MD on AD**

Abbreviations: MD, mean diffusivity; AD, Alzheimer's disease

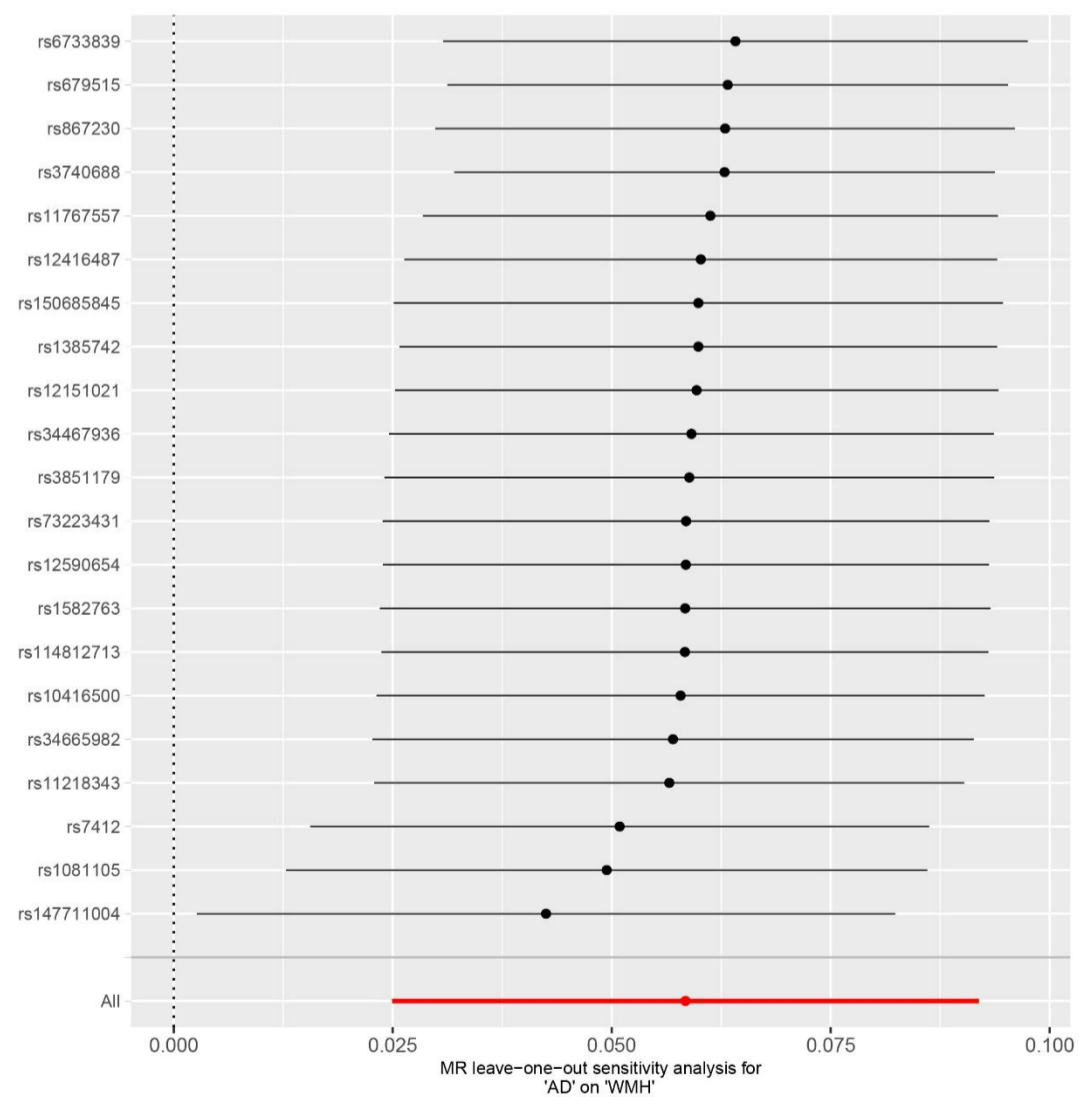

**FigureS4 MR leave-one-out sensitivity analysis for AD on WMH**

Abbreviations: WMH, white matter hyperintensities; AD, Alzheimer's disease

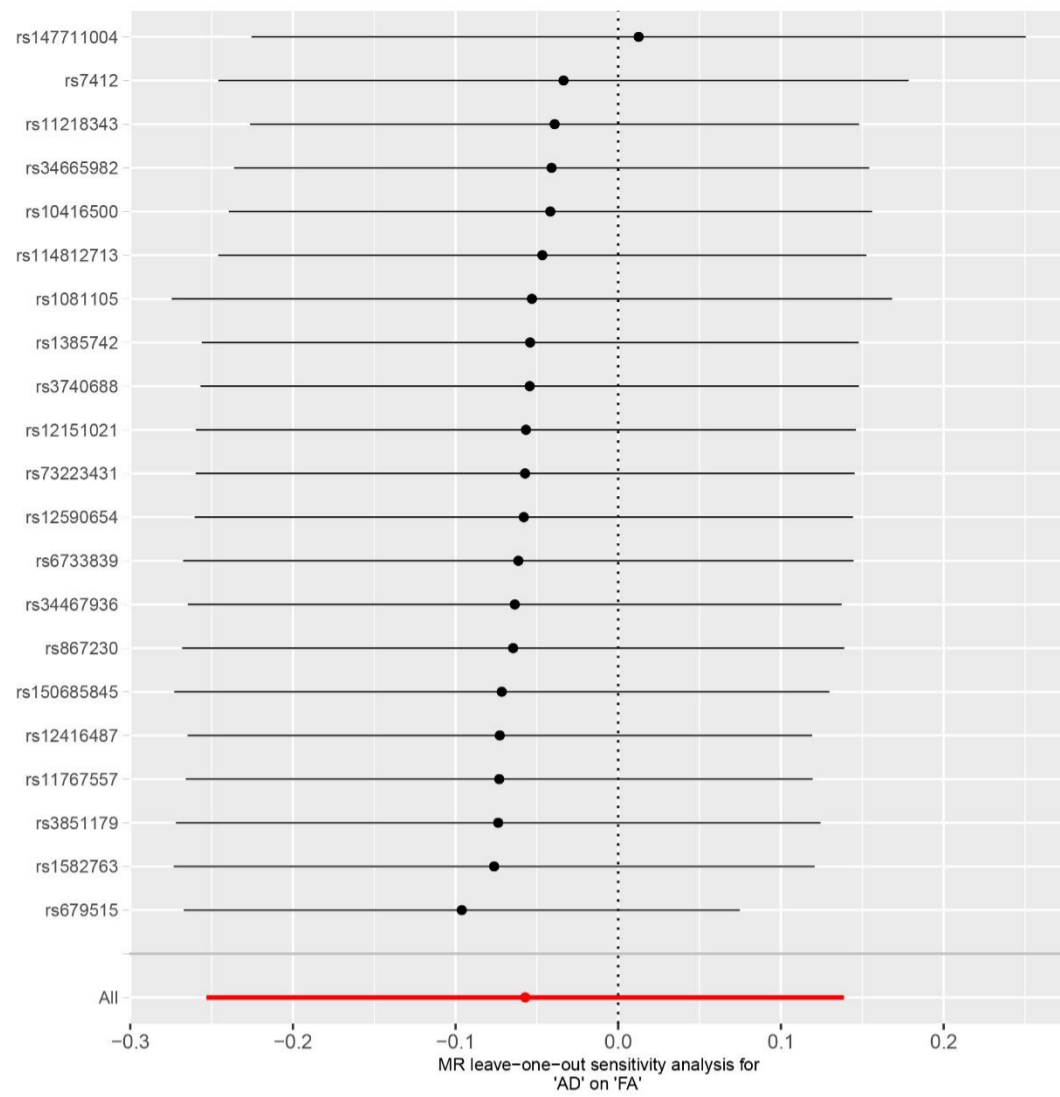

**FigureS5 MR leave-one-out sensitivity analysis for AD on FA**

Abbreviations: FA, fractional anisotropy; AD, Alzheimer's disease

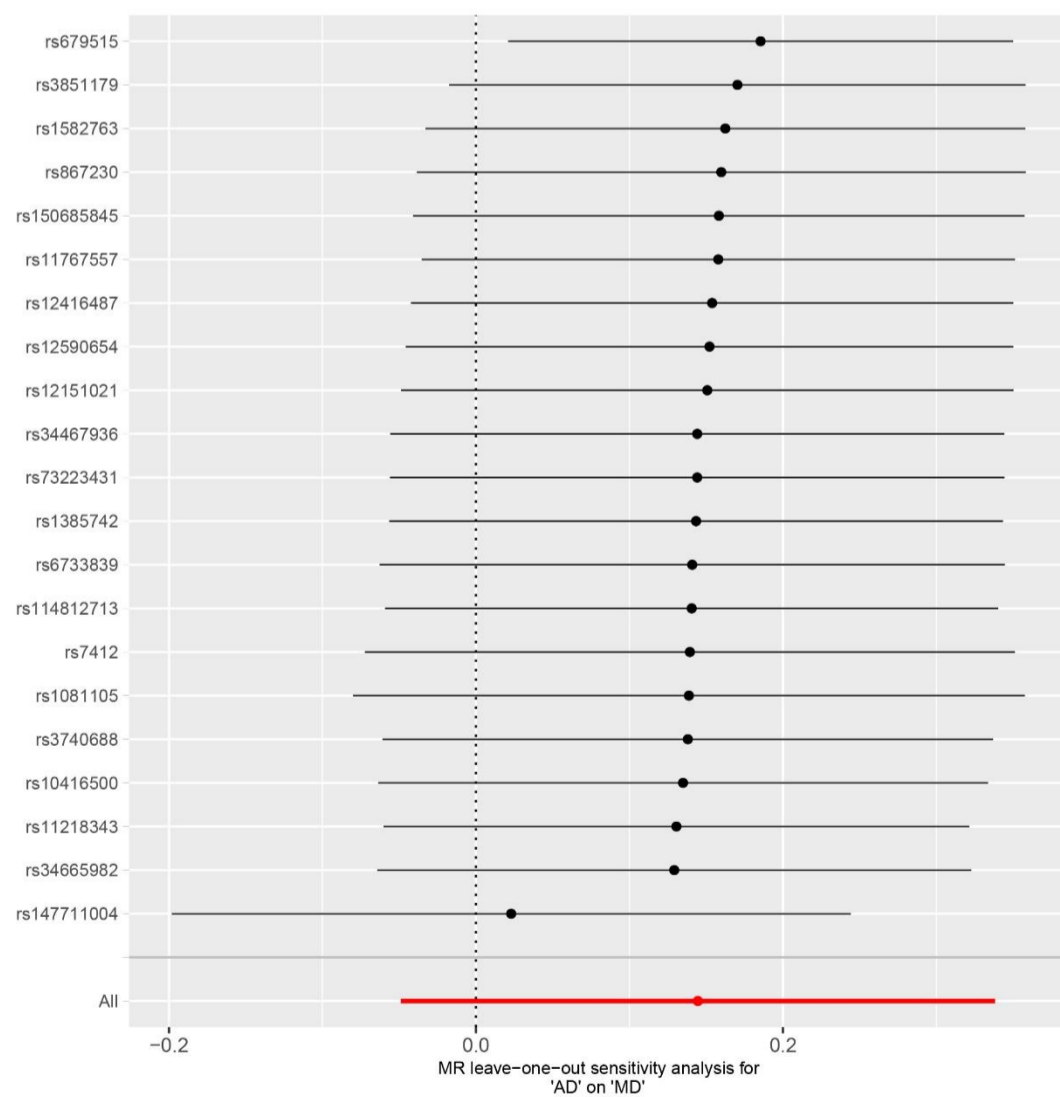

**FigureS6 MR leave-one-out sensitivity analysis for AD on MD**

Abbreviations: MD, mean diffusivity; AD, Alzheimer's disease

**Table S1 Data sources and the instrumental variable used for exposure included in the MR analyses**

| Exposure               | Sample size | Cases  | Population | SNPs | R <sup>2</sup> | F-statistic |
|------------------------|-------------|--------|------------|------|----------------|-------------|
| The effect of WH on AD |             |        |            |      |                |             |
| WMH                    | 18,381      | NA     | European   | 8    | 0.0035         | 64.832      |
| FA                     | 17,673      | NA     | European   | 8    | 0.0032         | 57.581      |
| MD                     | 17,467      | NA     | European   | 9    | 0.0039         | 67.782      |
| The effect of AD on WM |             |        |            |      |                |             |
| AD                     | 63,926      | 21,982 | European   | 21   | 0.0037         | 234.876     |

Note

R<sup>2</sup>, calculated the 90th percentile of variance estimations;

F-statistic, calculated the 90th percentile strength of the instrument based on the formula:  $F=R^2 \times (N-2)/(1-R^2)$

Abbreviations: MR, Mendelian randomization; SNP, single nucleotide polymorphism; WM, white matter; AD, Alzheimer's disease; WMH, white matter hyperintensities; FA, fractional anisotropy; MD, mean diffusivity

**Table S2 Pleiotropy, heterogeneity analyses, and power for MR analysis**

| Phenotype              | IVW-Phet  |         | MR Egger-Phet |         | MR Egger-Ppltr |         | MR PRESSO-Ppltr | Power |
|------------------------|-----------|---------|---------------|---------|----------------|---------|-----------------|-------|
|                        | Cochran Q | P_value | Cochran Q     | P_value | Intercept      | P_value |                 |       |
| The effect of WM on AD |           |         |               |         |                |         |                 |       |
| WMH                    |           |         |               |         |                |         |                 |       |
| Total                  | 9.17      | 0.24    | 6.67          | 0.35    | 0.03           | 0.18    | 0.25            | 1.00  |
| FA                     |           |         |               |         |                |         |                 |       |
| Total                  | 21.75     | <0.01   | 21.66         | <0.01   | 0.01           | 0.88    | 0.01            | 1.00  |
| MD                     |           |         |               |         |                |         |                 |       |
| Total                  | 19.72     | 0.01    | 18.79         | 0.01    | -0.02          | 0.58    | 0.03            | 1.00  |
| The effect of AD on WM |           |         |               |         |                |         |                 |       |
| WMH                    |           |         |               |         |                |         |                 |       |
| Total                  | 33.22     | 0.03    | 19.63         | 0.42    | -0.01          | <0.01   | <0.01           | 0.60  |
| Without <i>APOE</i>    | 16.88     | 0.33    | 16.67         | 0.27    | 0.00           | 0.68    | 0.33            | 0.09  |
| FA                     |           |         |               |         |                |         |                 |       |
| Total                  | 52.54     | <0.01   | 59.32         | <0.01   | 0.04           | 0.13    | <0.01           | 0.92  |
| Without <i>APOE</i>    | 23.25     | 0.04    | 22.37         | 0.03    | 0.04           | 0.50    | <0.01           | 0.16  |
| MD                     |           |         |               |         |                |         |                 |       |
| Total                  | 55.47     | <0.01   | 46.34         | <0.01   | -0.05          | 0.07    | <0.01           | 1.00  |
| Without <i>APOE</i>    | 26.65     | 0.02    | 25.52         | 0.02    | -0.05          | 0.46    | <0.01           | 0.12  |

Note

Power for MR analyses, calculated using an online calculator(<https://sb452.shinyapps.io/power/>);

Phet, P-value for heterogeneity between instrumental SNP causal estimates;

Ppltr, P-value for horizontal pleiotropy from MR-Egger intercept test or MR-PRESSO global test;

IVW, inverse variance weighted; MR-PRESSO, Pleiotropy Residual Sum and Outlier

**Table S3 Summary statistics for the genetic instruments used to assess the effect of WM on AD**

| Exposure   | SNPs       | BETA  | SE   | P-value |
|------------|------------|-------|------|---------|
| WMH        | rs12571024 | -0.22 | 0.25 | 0.39    |
|            | rs12615761 | -0.17 | 0.26 | 0.51    |
|            | rs12921170 | 0.33  | 0.25 | 0.19    |
|            | rs2293767  | 0.32  | 0.27 | 0.23    |
|            | rs275350   | 0.53  | 0.24 | 0.03    |
|            | rs34974290 | -0.13 | 0.17 | 0.45    |
|            | rs4525538  | 0.01  | 0.21 | 0.97    |
|            | rs7596872  | 0.02  | 0.20 | 0.92    |
| FA         | rs3129171  | -0.05 | 0.06 | 0.47    |
|            | rs33599    | -0.01 | 0.06 | 0.81    |
|            | rs4150221  | 0.19  | 0.06 | 0.00    |
|            | rs56874662 | -0.11 | 0.07 | 0.14    |
|            | rs6062264  | 0.00  | 0.06 | 0.97    |
|            | rs67827860 | 0.00  | 0.03 | 0.96    |
|            | rs7590302  | -0.05 | 0.06 | 0.41    |
|            | rs76122535 | -0.15 | 0.06 | 0.01    |
| MD         | rs11813268 | -0.04 | 0.06 | 0.50    |
|            | rs1233587  | 0.04  | 0.05 | 0.41    |
|            | rs3020581  | 0.05  | 0.06 | 0.43    |
|            | rs3095276  | 0.08  | 0.08 | 0.32    |
|            | rs3117426  | 0.06  | 0.07 | 0.33    |
|            | rs33599    | 0.01  | 0.05 | 0.81    |
|            | rs4150221  | -0.21 | 0.06 | 0.00    |
|            | rs62055544 | -0.13 | 0.06 | 0.03    |
| rs67827860 | 0.00       | 0.03  | 0.96 |         |

**Note**

Abbreviations: SNP, single nucleotide polymorphism; WM, white matter; AD, Alzheimer's disease; WMH, white matter hyperintensities; FA, fractional anisotropy; MD, mean diffusivity

**TableS4 Summary statistics for the genetic instruments used to assess the effect of AD on WM**

| Outcome  | SNPs        | BETA  | SE   | P-value |
|----------|-------------|-------|------|---------|
| WMH      | rs10416500  | 0.08  | 0.09 | 0.35    |
|          | rs1081105   | 0.10  | 0.03 | 0.00    |
|          | rs11218343  | 0.22  | 0.12 | 0.08    |
|          | rs114812713 | 0.06  | 0.10 | 0.55    |
|          | rs11767557  | -0.15 | 0.11 | 0.19    |
|          | rs12151021  | -0.01 | 0.10 | 0.93    |
|          | rs12416487  | -0.08 | 0.12 | 0.49    |
|          | rs12590654  | 0.06  | 0.11 | 0.62    |
|          | rs1385742   | -0.05 | 0.12 | 0.65    |
|          | rs147711004 | 0.09  | 0.02 | 0.00    |
|          | rs150685845 | 0.02  | 0.07 | 0.82    |
|          | rs1582763   | 0.06  | 0.08 | 0.46    |
|          | rs34467936  | 0.01  | 0.11 | 0.92    |
|          | rs34665982  | 0.14  | 0.10 | 0.17    |
|          | rs3740688   | -0.21 | 0.10 | 0.04    |
|          | rs3851179   | 0.04  | 0.08 | 0.61    |
|          | rs6733839   | -0.05 | 0.06 | 0.41    |
|          | rs679515    | -0.13 | 0.08 | 0.13    |
|          | rs73223431  | 0.05  | 0.11 | 0.61    |
|          | rs7412      | 0.11  | 0.04 | 0.00    |
| rs867230 | -0.08       | 0.07  | 0.30 |         |
| FA       | rs10416500  | -0.74 | 0.39 | 0.06    |
|          | rs1081105   | -0.08 | 0.14 | 0.58    |
|          | rs11218343  | -1.62 | 0.54 | 0.00    |
|          | rs114812713 | -0.69 | 0.45 | 0.13    |
|          | rs11767557  | 1.11  | 0.50 | 0.03    |
|          | rs12151021  | -0.08 | 0.43 | 0.85    |
|          | rs12416487  | 1.21  | 0.52 | 0.02    |
|          | rs12590654  | 0.01  | 0.49 | 0.99    |
|          | rs1385742   | -0.29 | 0.51 | 0.57    |
|          | rs147711004 | -0.20 | 0.10 | 0.05    |
|          | rs150685845 | 0.36  | 0.32 | 0.26    |
|          | rs1582763   | 0.63  | 0.35 | 0.07    |
|          | rs34467936  | 0.39  | 0.49 | 0.43    |
|          | rs34665982  | -0.96 | 0.44 | 0.03    |
|          | rs3740688   | -0.22 | 0.46 | 0.63    |
|          | rs3851179   | 0.58  | 0.36 | 0.11    |
|          | rs6733839   | 0.02  | 0.26 | 0.93    |
|          | rs679515    | 1.45  | 0.37 | 0.00    |
|          | rs73223431  | -0.05 | 0.46 | 0.91    |
|          | rs7412      | -0.23 | 0.17 | 0.17    |
| rs867230 | 0.16        | 0.32  | 0.61 |         |

|    |             |       |      |      |
|----|-------------|-------|------|------|
| MD | rs10416500  | 0.57  | 0.40 | 0.15 |
|    | rs1081105   | 0.17  | 0.14 | 0.22 |
|    | rs11218343  | 1.36  | 0.55 | 0.01 |
|    | rs114812713 | 0.39  | 0.46 | 0.41 |
|    | rs11767557  | -0.82 | 0.51 | 0.11 |
|    | rs12151021  | -0.18 | 0.44 | 0.68 |
|    | rs12416487  | -0.60 | 0.54 | 0.26 |
|    | rs12590654  | -0.40 | 0.50 | 0.43 |
|    | rs1385742   | 0.23  | 0.52 | 0.65 |
|    | rs147711004 | 0.40  | 0.10 | 0.00 |
|    | rs150685845 | -0.25 | 0.32 | 0.44 |
|    | rs1582763   | -0.49 | 0.36 | 0.17 |
|    | rs34467936  | 0.17  | 0.50 | 0.73 |
|    | rs34665982  | 1.00  | 0.45 | 0.02 |
|    | rs3740688   | 0.54  | 0.47 | 0.25 |
|    | rs3851179   | -0.84 | 0.37 | 0.02 |
|    | rs6733839   | 0.21  | 0.26 | 0.42 |
|    | rs679515    | -1.43 | 0.37 | 0.00 |
|    | rs73223431  | 0.17  | 0.47 | 0.72 |
|    | rs7412      | 0.18  | 0.17 | 0.28 |
|    | rs867230    | -0.31 | 0.33 | 0.35 |

---

Note

Abbreviations: SNP, single nucleotide polymorphism; WM, white matter; AD, Alzheimer's disease; WMH, white matter hyperintensities; FA, fractional anisotropy; MD, mean diffusivity
